# Supplementary material
Source: PubMed Central journal article supplement (PMC6013655)
Supplement: IAI.00096-18_zii999092454s1.pdf [file IAI.00096-18_zii999092454s1.pdf]

## **Supplemental Information for:**

### **The two-component signaling system VraSR<sub>SS</sub> is critical for multidrug resistance and full virulence in *Streptococcus suis* serotype 2**

Xiaojun Zhong,<sup>a,b,c</sup> Yue Zhang,<sup>a,b,c</sup> Yinchu Zhu,<sup>a,b,c</sup> Wenyang Dong,<sup>a,b,c</sup> Jiale Ma,<sup>a,b,c</sup> Zihao Pan,<sup>a,b,c</sup> Shipra Roy,<sup>a,b,c</sup> Chengping Lu,<sup>a,b,c</sup> and Huochun Yao<sup>a,b,c,\*</sup>

<sup>a</sup>College of Veterinary Medicine, Nanjing Agricultural University, Nanjing 210095, China

<sup>b</sup>OIE Reference Lab for Swine Streptococcosis, Nanjing 210095, China

<sup>c</sup>Key Lab of Animal Bacteriology, Ministry of Agriculture, Nanjing 210095, China

**Supplemental Table S1. Calculations of LD<sub>50</sub> on the WT and  $\Delta$ vraSR<sub>SS</sub> strains for zebrafish**

| Dose of challenge CFU | Number of death/total  |                              |
|-----------------------|------------------------|------------------------------|
|                       | ZY05719                | $\Delta$ vraSR <sub>SS</sub> |
| $5.0 \times 10^7$     | 15/15                  | 11/15                        |
| $5.0 \times 10^6$     | 13/15                  | 5/15                         |
| $5.0 \times 10^5$     | 12/15                  | 5/15                         |
| $5.0 \times 10^4$     | 1/15                   | 3/15                         |
| LD <sub>50</sub>      | $3.09 \times 10^5$ CFU | $6.84 \times 10^6$ CFU       |

**Supplemental Table S2. Differentially expressed genes in the  $\Delta$ *vraSR<sub>SS</sub>* strain versus WT strain**

| Gene/locus name          | Function or description                                       | log2 Fold Change | p-value   | q-value   |
|--------------------------|---------------------------------------------------------------|------------------|-----------|-----------|
| <i>ZY05719_00865</i>     | molecular chaperone GroES                                     | -2.4719          | 6.86E-85  | 4.07E-83  |
| <i>ZY05719_00870</i>     | molecular chaperone GroEL                                     | -1.997           | 2.82E-139 | 2.51E-137 |
| <i>ZY05719_01205</i>     | PTS system trehalose-specific transporter subunits IIBCA      | -2.3568          | 0.017399  | 0.035302  |
| <i>ZY05719_01910</i>     | 4-alpha-glucanotransferase                                    | -2.8234          | 0.020566  | 0.040633  |
| <i>ZY05719_01915</i>     | maltose phosphorylase                                         | -2.941           | 0.0083811 | 0.018798  |
| <i>ZY05719_01925</i>     | endonuclease                                                  | -3.2354          | 0.01209   | 0.025703  |
| <i>ZY05719_01930</i>     | PTS system glucose/maltose-specific transporter subunit IIBCA | -4.0443          | 0.0019246 | 0.0051754 |
| <i>yvqF<sub>SS</sub></i> | membrane protein                                              | -1.9191          | 2.38E-43  | 6.57E-42  |
| <i>ZY05719_02090</i>     | peptidylprolyl isomerase                                      | -3.147           | 3.02E-258 | 3.48E-256 |
| <i>ZY05719_02095</i>     | RNA-binding protein                                           | -3.1654          | 6.38E-117 | 5.21E-115 |
| <i>ZY05719_02235</i>     | PTS fructose transporter subunit IID                          | -1.9845          | 1.94E-05  | 7.94E-05  |
| <i>cps2A</i>             | LytR family transcriptional regulator                         | -2.4865          | 2.04E-64  | 8.33E-63  |
| <i>cps2B</i>             | capsular biosynthesis protein CpsC                            | -2.5359          | 1.71E-74  | 8.15E-73  |
| <i>cps2C</i>             | tyrosine protein kinase                                       | -2.5519          | 4.79E-51  | 1.54E-49  |
| <i>cps2D</i>             | tyrosine protein phosphatase                                  | -2.6023          | 2.69E-38  | 6.75E-37  |
| <i>cps2E</i>             | galactosyl transferase                                        | -2.4008          | 5.48E-23  | 9.02E-22  |
| <i>cps2F</i>             | glycosyl transferase                                          | -2.4365          | 1.76E-27  | 3.44E-26  |
| <i>cps2G</i>             | glycosyl transferase family 1                                 | -2.4692          | 4.36E-22  | 6.83E-21  |
| <i>cps2H</i>             | glycosyl transferase                                          | -2.451           | 1.49E-16  | 1.84E-15  |
| <i>cps2I</i>             | polymerase                                                    | -2.5556          | 8.07E-22  | 1.23E-20  |
| <i>cps2J</i>             | glycosyl transferase                                          | -2.429           | 2.44E-25  | 4.46E-24  |
| <i>cps2K</i>             | glycosyl transferase                                          | -2.4795          | 2.00E-67  | 8.71E-66  |
| <i>ZY05719_02805</i>     | membrane protein                                              | -2.4584          | 2.47E-142 | 2.30E-140 |

|               |                                                       |         |           |           |
|---------------|-------------------------------------------------------|---------|-----------|-----------|
| ZY05719_02830 | lipooligosaccharide sialyltransferase                 | -2.4233 | 1.97E-80  | 9.87E-79  |
| ZY05719_02835 | capsid assembly protein                               | -2.3994 | 1.19E-91  | 7.50E-90  |
| <i>neuB</i>   | N-acetyl neuramic acid synthetase NeuB                | -2.1127 | 5.54E-101 | 3.87E-99  |
| <i>neuC</i>   | UDP-N-acetylglucosamine 2-epimerase                   | -2.122  | 6.34E-151 | 6.54E-149 |
| <i>neuD</i>   | NeuD protein                                          | -2.153  | 3.10E-145 | 3.03E-143 |
| <i>neuA</i>   | acylneuraminate cytidyltransferase                    | -2.1608 | 3.41E-46  | 1.01E-44  |
| ZY05719_02860 | transposase                                           | -2.1879 | 1.97E-35  | 4.53E-34  |
| ZY05719_02865 | transposase                                           | -2.4367 | 3.19E-15  | 3.53E-14  |
| ZY05719_02870 | transposase                                           | -1.7393 | 0.008582  | 0.019204  |
| ZY05719_02880 | transposase                                           | -1.8402 | 0.0003175 | 0.0010377 |
| ZY05719_03085 | glucosamine-6-phosphate deaminase                     | -1.7509 | 2.80E-104 | 2.03E-102 |
| ZY05719_03350 | phosphopantothenate--cysteine ligase                  | -1.6782 | 1.40E-84  | 8.05E-83  |
| ZY05719_03965 | PTS fructose transporter subunit IIC                  | -2.0035 | 0.0004108 | 0.001308  |
| ZY05719_04825 | hypothetical protein                                  | -3.7858 | 3.07E-274 | 3.76E-272 |
| ZY05719_06720 | iron transporter FeoA                                 | -1.9556 | 1.24E-16  | 1.53E-15  |
| ZY05719_07065 | 6-phospho-beta-glucosidase                            | -2.234  | 3.52E-12  | 3.25E-11  |
| ZY05719_07070 | PTS beta-glucoside transporter subunit IIABC          | -2.3212 | 1.33E-19  | 1.86E-18  |
| ZY05719_07075 | transcription antiterminator BglG                     | -2.4408 | 7.75E-17  | 9.91E-16  |
| ZY05719_07740 | multidrug ABC transporter ATPase                      | -1.7944 | 1.37E-58  | 5.07E-57  |
| ZY05719_09640 | carbonate dehydratase                                 | -1.7899 | 2.53E-99  | 1.71E-97  |
| ZY05719_09685 | membrane protein                                      | -1.8771 | 4.12E-81  | 2.12E-79  |
| ZY05719_09775 | PTS system ascorbate-specific transporter subunit IIB | -1.7488 | 0.0004965 | 0.001543  |
| ZY05719_10085 | 4-alpha-glucanotransferase                            | -2.1776 | 0.021202  | 0.041638  |
| ZY05719_10090 | sugar ABC transporter substrate-binding protein       | -2.3805 | 0.0094868 | 0.020942  |
| ZY05719_10095 | sugar ABC transporter permease                        | -2.7956 | 0.0059016 | 0.013855  |
| ZY05719_10100 | sugar ABC transporter permease                        | -2.7684 | 0.0053412 | 0.012754  |

|               |                                        |         |           |           |
|---------------|----------------------------------------|---------|-----------|-----------|
| ZY05719_10105 | maltodextrose utilization protein MalA | -1.9918 | 0.012738  | 0.026875  |
| ZY05719_10110 | LacI family transcriptional regulator  | -1.9682 | 0.012214  | 0.025938  |
| ZY05719_10115 | alpha-amylase                          | -2.0705 | 0.0037    | 0.0092904 |
| ZY05719_00300 | amino acid transporter                 | 2.0608  | 1.46E-06  | 7.50E-06  |
| ZY05719_00310 | membrane protein                       | 2.1684  | 0.0017557 | 0.004768  |
| ZY05719_00315 | multidrug ABC transporter ATPase       | 1.7575  | 1.11E-05  | 4.83E-05  |
| ZY05719_00320 | membrane protein                       | 1.8094  | 3.96E-05  | 0.0001543 |
| ZY05719_00700 | hypothetical protein                   | 2.024   | 0.002147  | 0.0057117 |
| ZY05719_00720 | zinc-binding protein                   | 1.7036  | 2.90E-84  | 1.62E-82  |
| ZY05719_00770 | competence protein CglA                | 1.8436  | 9.85E-05  | 0.0003598 |
| ZY05719_01650 | adhesion protein                       | 2.4821  | 3.92E-60  | 1.51E-58  |
| ZY05719_01655 | histidine triad protein                | 3.4093  | 6.67E-93  | 4.35E-91  |
| ZY05719_04345 | integrase                              | 2.42    | 6.15E-129 | 5.23E-127 |
| ZY05719_04350 | hypothetical protein                   | 4.8682  | 2.21E-116 | 1.73E-114 |
| ZY05719_04390 | hypothetical protein                   | 7.6572  | 1.61E-194 | 1.75E-192 |
| ZY05719_04425 | ATPase AAA                             | 1.759   | 1.10E-26  | 2.14E-25  |
| ZY05719_04440 | hypothetical protein                   | 3.9844  | 0.014971  | 0.030856  |
| ZY05719_04445 | DNA-binding protein                    | 2.1871  | 0.024965  | 0.048064  |
| ZY05719_04450 | DNA-binding protein                    | 1.6697  | 2.10E-13  | 2.20E-12  |
| ZY05719_04460 | conjugal transfer protein              | 2.2911  | 2.93E-05  | 0.0001161 |
| ZY05719_04465 | peptidase P60                          | 1.8754  | 0.00344   | 0.0086909 |
| ZY05719_04470 | membrane protein                       | 2.2684  | 4.07E-05  | 0.0001582 |
| ZY05719_04475 | ATP/GTP-binding protein                | 1.8812  | 3.66E-08  | 2.32E-07  |
| ZY05719_04485 | antirestriction protein ArdA           | 3.8565  | 0.0021101 | 0.0056289 |
| ZY05719_04500 | cell division protein FtsK             | 2.5251  | 2.11E-06  | 1.05E-05  |

|               |                                                     |        |           |           |
|---------------|-----------------------------------------------------|--------|-----------|-----------|
| ZY05719_04545 | chemotaxis protein                                  | 2.4807 | 0.0063012 | 0.014705  |
| ZY05719_04555 | DNA primase                                         | 1.7658 | 2.20E-05  | 8.97E-05  |
| ZY05719_04600 | lantibiotic-modifying protein                       | 1.7234 | 8.70E-17  | 1.10E-15  |
| ZY05719_04670 | hypothetical protein                                | 1.666  | 5.26E-15  | 5.72E-14  |
| ZY05719_04685 | glucan-binding protein                              | 2.1056 | 6.59E-19  | 8.97E-18  |
| ZY05719_04705 | ATPase AAA                                          | 2.1849 | 2.83E-11  | 2.39E-10  |
| ZY05719_04715 | conjugal transfer protein TrbL                      | 2.087  | 0.0003308 | 0.0010722 |
| ZY05719_04725 | conjugal transfer protein TraG                      | 3.1796 | 8.83E-11  | 7.11E-10  |
| ZY05719_04730 | hypothetical protein                                | 2.3217 | 0.0078248 | 0.017692  |
| ZY05719_04735 | CAAX protease                                       | 2.5037 | 0.0001938 | 0.0006599 |
| ZY05719_04750 | hypothetical protein                                | 1.8276 | 0.002348  | 0.0061544 |
| ZY05719_04765 | modification methylase                              | 2.1982 | 1.79E-05  | 7.35E-05  |
| ZY05719_04775 | replication initiator protein                       | 2.4023 | 0.000227  | 0.0007651 |
| ZY05719_04935 | amino acid ABC transporter ATP-binding protein      | 1.9674 | 1.78E-20  | 2.62E-19  |
| ZY05719_05060 | hypothetical protein                                | 1.7674 | 0.018181  | 0.036548  |
| ZY05719_05765 | aconitate hydratase                                 | 1.8571 | 1.63E-41  | 4.36E-40  |
| ZY05719_05870 | transposase                                         | 1.6207 | 9.07E-59  | 3.41E-57  |
| ZY05719_05880 | hypothetical protein                                | 1.6288 | 2.65E-20  | 3.88E-19  |
| ZY05719_05900 | XRE family transcriptional regulator                | 2.71   | 0.0011353 | 0.0032357 |
| ZY05719_05905 | hypothetical protein                                | 1.6998 | 3.39E-37  | 8.31E-36  |
| ZY05719_06500 | ABC transporter                                     | 1.8692 | 9.09E-62  | 3.56E-60  |
| ZY05719_06505 | glutamine ABC transporter substrate-binding protein | 1.7082 | 1.06E-67  | 4.70E-66  |
| ZY05719_06510 | glutamine ABC transporter permease                  | 1.638  | 7.14E-55  | 2.41E-53  |
| ZY05719_07220 | hypothetical protein                                | 1.8961 | 0.0017442 | 0.0047563 |
| ZY05719_07485 | histidine triad protein                             | 2.1649 | 3.61E-106 | 2.72E-104 |
| ZY05719_07650 | transposase                                         | 3.8633 | 5.34E-58  | 1.94E-56  |

|                      |                                |        |           |           |
|----------------------|--------------------------------|--------|-----------|-----------|
| <i>ZY05719_09070</i> | sugar ABC transporter permease | 1.6614 | 0.018166  | 0.036548  |
| <i>ZY05719_09220</i> | translation factor (SUA5)      | 1.671  | 2.57E-67  | 1.09E-65  |
| <i>ZY05719_09225</i> | isopropylmalate isomerase      | 1.6656 | 1.01E-45  | 2.94E-44  |
| <i>ZY05719_09620</i> | MFS transporter                | 3.4855 | 4.13E-278 | 5.39E-276 |
| <i>ZY05719_09625</i> | membrane protein               | 1.9987 | 2.20E-91  | 1.34E-89  |
| <i>ZY05719_09630</i> | DNA-binding protein            | 1.8095 | 1.57E-62  | 6.27E-61  |

---

**Supplemental Table S3. Bacterial strains and plasmids used in this study**

| Strains or plasmids       | Description <sup>a</sup>                                                                                     | Source or reference |
|---------------------------|--------------------------------------------------------------------------------------------------------------|---------------------|
| Bacterial strains         |                                                                                                              |                     |
| ZY05719                   | The SS2 strain was isolated from a diseased pig                                                              | Our laboratory      |
| $\Delta cps$              | Deletion mutant of the CPS synthesis cluster with ZY05719 background                                         | Our laboratory      |
| $\Delta vraSR_{SS}$       | Deletion mutant of <i>vraSR_{SS}</i> with ZY05719 background                                                 | This study          |
| $C\Delta vraSR_{SS}$      | $\Delta vraSR_{SS}$ with the vector pSET2- <i>vraSR_{SS}</i> , Spc <sup>r</sup>                              | This study          |
| $\Delta yvqF_{SS}$        | Deletion mutant of <i>yvqF_{SS}</i> with ZY05719 background                                                  | This study          |
| $C\Delta yvqF_{SS}$       | $\Delta yvqF_{SS}$ with the vector pSET2- <i>yvqF_{SS}</i> , Spc <sup>r</sup>                                | This study          |
| DH5 $\alpha$              | Cloning host for maintaining the recombinant plasmids                                                        | Invitrogen          |
| BL21 (DE3)                | Host for expressing the recombinant proteins                                                                 | Invitrogen          |
| Plasmids                  |                                                                                                              |                     |
| pSET4S                    | Temperature-sensitive suicide vector for <i>S. suis</i> mutagenesis, Spc <sup>r</sup>                        | (1)                 |
| pSET4S- <i>vraSR_{SS}</i> | Derived from pSET4S used to knock out <i>vraSR_{SS}</i> in ZY05719, Spc <sup>r</sup>                         | This study          |
| pSET4S- <i>yvqF_{SS}</i>  | Derived from pSET4S used to knock out <i>yvqF_{SS}</i> in ZY05719, Spc <sup>r</sup>                          | This study          |
| pSET2                     | <i>E. coli</i> - <i>S. suis</i> shuttle vector for <i>S. suis</i> complementation, Spc <sup>r</sup>          | (2)                 |
| pSET2- <i>vraSR_{SS}</i>  | pSET2 containing the promoter followed by the full-length <i>vraSR_{SS}</i> ORF, Spc <sup>r</sup>            | This study          |
| pSET2- <i>yvqF_{SS}</i>   | pSET2 containing the promoter followed by the full-length <i>yvqF_{SS}</i> ORF, Spc <sup>r</sup>             | This study          |
| pET28a (+)                | His-tag expressing vector, Kan <sup>r</sup>                                                                  | Invitrogen          |
| pET28a- <i>vraR_{SS}</i>  | pET28a inserted in-frame with the <i>vraR_{SS}</i> gene for expressing VraR <sub>SS</sub> , Kan <sup>r</sup> | This study          |

<sup>a</sup>Spc<sup>r</sup>, spectinomycin resistant; Kan<sup>r</sup>, kanamycin resistant.



**Supplemental Table S4. Primers used in this study**

| <b>Primers</b>                    | <b>Primers sequence (5'-3')</b>      |
|-----------------------------------|--------------------------------------|
| For Deletion                      |                                      |
| Del-vraSR-Upstream-F              | CTGATCGTCGAC TTACGATGGCAGCCTTTGAT    |
| Del-vraSR-Upstream-R              | CTATCCTTTGGT CACAAAAACAAT AAGACAGGC  |
| Del-vraSR-Downstream-F            | ATTGTTTTTGTG ACCAAAGGATAG TGGAATTA   |
| Del-vraSR-Downstream-R            | GAGTCAGAATTC TTCAACAACCTTAGCAACAC    |
| Del-yvqF-Upstream-F               | CTGATCGTCGAC AGGAAAAGAATTGATTATGCC   |
| Del-yvqF-Upstream-R               | ATCTCCCAGTAT TACCACATCAAA GGCTGCCAT  |
| Del-yvqF-Downstream-F             | TTTGATGTGGTA ATA CTGGGAGAT GTGGAGGTG |
| Del-yvqF-Downstream-R             | GAGTCAGAATTC TCAATTAGTTTCGGTAACTCC   |
| For identification                |                                      |
| vraSR-identification-F            | GCCCAAAGAGACCTACGCATCC               |
| vraSR-identification-R            | CTTCCTCGCCATCACTAGCTTC               |
| yvqF-identification-F             | CTAGGAAGAAAAGTCAACAGT                |
| yvqF-identification-R             | GGACTATTGACCGCTATACTT                |
| For complementation               |                                      |
| vraSR complementation-F           | AACTGCAG GAAAATCAAAATTATCCGTTGTC     |
| vraSR complementation-R           | CGGGATCC TATCTGAGTTTTGCATCCATATA     |
| yvqF complementation-F            | AACTGCAG ACCCAATGTCATTAAGTTATC       |
| yvqF complementation-R            | CGGGATCC AAAAGTGGGAGGGTGGAAGCA       |
| For VraR <sub>SS</sub> expression |                                      |

---

|            |                                     |
|------------|-------------------------------------|
| VraR 28a-F | CGGGATCC ATGAATACGATTCGAGTGATGCTG   |
| VraR 28a-R | CGGAATTC CTATTGGTCCTCTTGCGCCACCAAAC |

For checking

*yvqF<sub>ss</sub>/vraS<sub>ss</sub>/vraR<sub>ss</sub>* operon

|            |                        |
|------------|------------------------|
| yvqFvraS-F | GTAATTCGTAAAACGTTTGGGA |
| yvqFvraS-R | AACTTCGTCCGCATAACCTGA  |
| vraSvraR-F | CATTTGGATGTTTACCTCTTG  |
| vraSvraR-R | GCGCTTGCGGCCATTCCTTCA  |

For EMSA

|            |                       |
|------------|-----------------------|
| vra EMSA-F | CCAATGTCATTAAGTTATCTA |
| vra EMSA-R | GGGCTATAAACTAAATATTG  |
| cps EMSA-F | ATTATGACCAAGAAGTTGGTG |
| cps EMSA-R | TATTCAAAGCCATCCACCTTA |
| neu EMSA-F | AAGAATTGACCATCACTGCCA |
| neu EMSA-R | ATTTCTTTCGAATAGTCTCAG |
| 16s EMSA-F | CGAGCGCAGGCGGTTTGATAA |
| 16s EMSA-R | CTCATCGTTTACGGCGTGGAC |

For quantitative real-time reverse transcription-PCR

|             |                         |
|-------------|-------------------------|
| yvqF qPCR-F | TGATGTGGTAGCCAATGAGG    |
| yvqF qPCR-R | GAGATAAGGAGCTGACCAGTAAA |
| vraS qPCR-F | CAGGTTATGCGGACGAAGTTA   |
| vraS qPCR-R | GCGTGAGGTTTCTGACCTTAT   |
| vraR qPCR-F | CCAAGATGACTGGCGTAGAA    |

---

---

|                    |                           |
|--------------------|---------------------------|
| vraR qPCR-R        | GCTTCCAGCACAGGATAGAT      |
| 00865 qPCR-F       | CAGTTGGTGGCTTTGTCCTA      |
| 00865 qPCR-R       | CTCCGTTCAAGGTCCGAATC      |
| 01910 qPCR-F       | ATGCGGAGTTCATGGCTATC      |
| 01910 qPCR-R       | TGCCAATTCTAAGCGGTACTT     |
| 02090 qPCR-F       | GTGTTTCGTTGGGATGCTATTTT   |
| 02090 qPCR-R       | TTTCAGGTTTCAGGCCTAGTT     |
| 02775(cpsF) qPCR-F | CTTGTCGGATTGGTCCTTTCA     |
| 02775(cpsF) qPCR-R | CAATACTGTTCGGACGGGATAAC   |
| 02840(neuB) qPCR-F | TAGCACAGATATGCCCGTTTAT    |
| 02840(neuB) qPCR-R | ACAGCCATAACCAGTTGAAAGA    |
| 07070 qPCR-F       | GGCCTACTCAGCTTCACAAA      |
| 07070 qPCR-R       | GAAGTGGATCACCTGAAGATAACC  |
| 01650 qPCR-F       | ACTCAACACACAGCCTTCTC      |
| 01650 qPCR-R       | CAACTGTCTAGGACTTGGTTCTT   |
| 04460 qPCR-F       | GGATTTTCAGATATGGACGGTAGAG |
| 04460 qPCR-R       | CAGAGTGGACGGTCTTTGTATT    |
| 04600 qPCR-F       | GTGGGATTTGCTCATGGATTTAC   |
| 04600 qPCR-R       | ACCATCCCGAGCTAGGATATAA    |
| 09625 qPCR-F       | GTCGCTTGTCTTACTCTGTCTT    |
| 09625 qPCR-R       | GCTGTATCGCGTCCCTTATC      |
| <i>parC</i> qPCR-R | TGGAGATGCACGGAAACAA       |
| <i>parC</i> qPCR-R | CTCGATGTCAGCCAAGAGATAG    |

---

Underlined are restriction cutting sites;

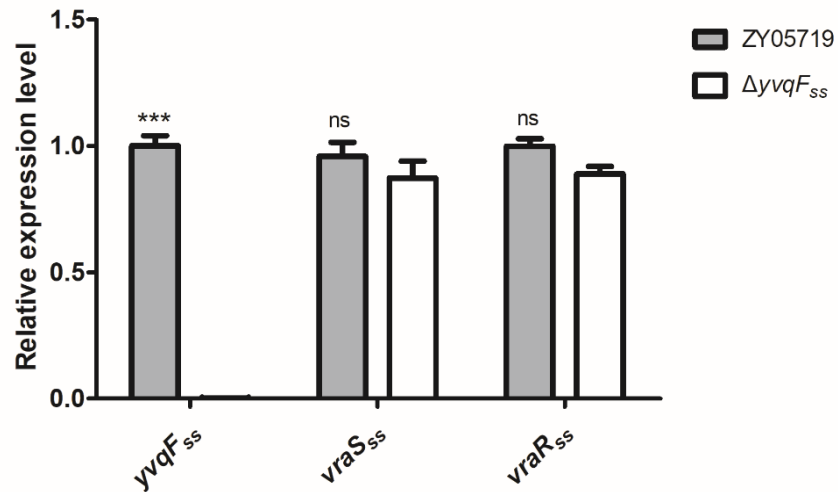

**Supplemental Figure S1 Expression levels of *yvqF<sub>ss</sub>*, *vraS<sub>ss</sub>*, and *vraR<sub>ss</sub>* in strains ZY05719 and  $\Delta yvqF_{ss}$  were measured by qRT-PCR.** qRT-PCR expression values are means plus standard deviations (error bars) from at least three independent experiments. The unpaired two-tailed Student's *t* test were used for statistical analysis (ns,  $P > 0.05$ ; \*\*\*,  $P < 0.001$ ).

1. Takamatsu D, Osaki M, Sekizaki T. 2001. Thermosensitive suicide vectors for gene replacement in *Streptococcus suis*. *Plasmid* 46:140-8.
2. Takamatsu D, Osaki M, Sekizaki T. 2001. Construction and characterization of *Streptococcus suis*-*Escherichia coli* shuttle cloning vectors. *Plasmid* 45:101-13.
